# Supplementary material for: Impacts of Land-Use Change on the Spatio-Temporal Patterns of Terrestrial Ecosystem Carbon Storage in the Gansu Province, Northwest China
Source: MDPI journal article supplement (doi:10.3390/rs14133164), 2022-07-01
Supplement: s1 [file s1]

## Supplementary Materials

### **Impacts of Land-Use Change on the Spatio-Temporal Patterns of Terrestrial Ecosystem Carbon Storage in the Gansu Province, Northwest China**

#### **Contents of this file**

1. The uncertainty of carbon density
2. The detailed procedure of estimating carbon density for different periods
3. The LUCC simulation and CS distribution for 2030 and 2050
4. Carbon storage under different LUCC and climate change scenarios
5. The fire statistics of the Gansu Province from 2000 to 2017

## 1. The uncertainty of carbon density

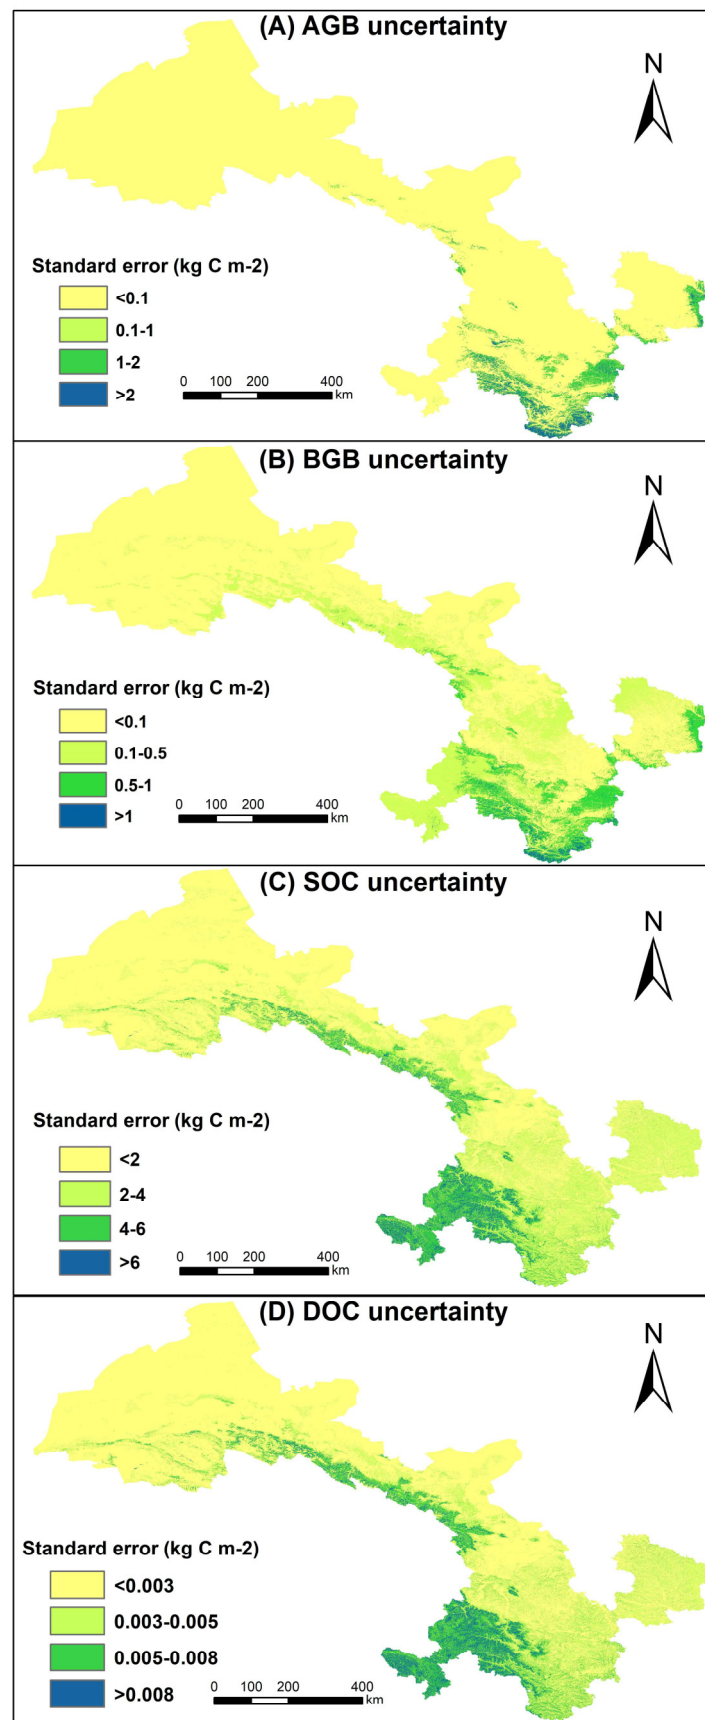

**Figure S1.** The spatial distribution of uncertainty (expressed as standard error) for each carbon density.

## **2. The detailed procedure of estimating carbon density for different periods**

In this study, based on above- and below-ground biomass carbon density, and soil organic carbon density data in the standard period (2010s), we integrated the elements of temperature, precipitation, CO<sub>2</sub> fertilization effects, and the management of forest and agriculture to established empirical regression equations to calculate carbon density dynamics data under each land-use type in the historical periods (1980s, 2000s, and 2020s) and future periods (2030s and 2050s under the SSP126, SSP245, and SSP585 scenarios). The processes mainly consist of three steps: data preparation and pre-processing, establishing the regression equations, and calculating carbon density dynamics data for each period.

### **2.1 Data preparation and pre-processing**

#### **2.1.1 Carbon density maps**

- a. The above- and below-ground biomass carbon density of high-resolution are obtained from NASA ORNL DAAC.
- b. The soil carbon density data are obtained from the Chinese High-Resolution National Soil Information Grid Basic Dataset with a spatial resolution of 90 m.
- c. The dataset of “A dataset of Organic carbon storage and carbon dynamic in arid and semiarid China from 1980 to 2014”, including the spatial distribution of carbon density (AGC, BGC, SOC, and DOC) in arid and semi-arid regions of China.

#### **2.1.2 Influencing factors**

- a. The spatial distributions of mean temperature and precipitation in 1980s, 2000s, 2020s, 2030s, and 2050s were obtained from Peng et al. (<https://data.tpdc.ac.cn/zh-hans/data/71ab4677-b66c-4fd1-a004-b2a541c4d5bf/>) with the pre-processing of monthly scale of historical and future dataset. The effects of climate change on carbon dynamics over time were quantified by regressing the relationships between carbon density and climate variables over space.
- b. The CO<sub>2</sub> fertilization effect was assessed with the changes of different periods to the base period and the assumption of a 15.5% increase in productivity for each 100 ppm rising of CO<sub>2</sub> concentration compared to the base period. The effect of CO<sub>2</sub> fertilization on biomass carbon density was then additionally added to the climate-induced effect based on procedure 1.
- c. The difference in carbon density of forest species divided by the span of forest age is used as the carbon sequestration rate [69], and then the effect of forest management on carbon density is measured in combination with the carbon density

of the base period. The effect of management and natural growth on forest biomass carbon density was then additionally added to the above effects based on procedures 1 and 2.

- d. After the field trial of multi-point in China, Cheng et al. [70] concluded that agricultural management could increase the agricultural SOC by  $0.02 \text{ kg C m}^{-2}$  on average, supplemented by a time span to correct for SOC density in farmland. The effect of agricultural managements on SOC density in farmland was also additionally added to the effects induced by climate and biomass changes.

## 2.2 Establishing the multiple linear regression equations

### 2.2.1 Above- and below-ground biomass carbon density with temperature and precipitation

We regressed the multiple linear regression relationships between vegetation biomass carbon density and temperature and precipitation based on the spatially distributed data points derived from raster layers (i.e., about 4.6 million points in total). The coefficients of the regression equations are shown below.

**Table S1.** The coefficients of multiple linear regression equations for both above- and below-ground biomass carbon density as a dependent variable of the temperature and precipitation.

| Top-level categories | Sub-categories                | AGC      |          | BGC      |          |
|----------------------|-------------------------------|----------|----------|----------|----------|
|                      |                               | PRE      | TEM      | PRE      | TEM      |
| 1 Farmland           | 12 dry farmland               | 0.000197 | 0.021422 | 9.05E-05 | -0.01928 |
| 2 Forest             | 21 wood land                  | 0.006869 | 0.063487 | 0.001784 | -0.01031 |
|                      | 22 shrubbery land             | 0.002553 | 0.108207 | 0.001263 | -0.00579 |
|                      | 23 sparsely forested woodland | 0.004321 | 0.066245 | 0.001543 | -0.01358 |
|                      | 24 other forest land          | 0.00119  | 0.024238 | 0.000791 | -0.05042 |
| 3 Grassland          | 31 high coverage grassland    | 0.001796 | 0.095273 | 0.001316 | -0.01323 |
|                      | 32 middle coverage grassland  | 0.001159 | 0.022358 | 0.000935 | -0.02542 |
|                      | 33 low coverage grassland     | 0.00038  | 0.002164 | 0.000454 | -0.00772 |
| 4 Water              | 41 river and glacier          | 0        | 0        | 0        | 0        |
| 5 Built-up land      | 51 cities and towns           | 0.000145 | -0.00263 | 0.000089 | -0.0017  |
|                      | 52 rural settlements          | 3.46E-05 | 0.006652 | -1.7E-06 | -0.01877 |
|                      | 53 industry and traffic land  | 0.000565 | -0.00813 | 0.000389 | -0.01472 |
| 6 Other land         | 61 sandy land                 | 0.000189 | 0.000229 | 0.000527 | -0.00068 |
|                      | 62 Gobi                       | 0.000198 | 7.36E-05 | 0.0005   | -0.00169 |
|                      | 63 saline-alkali land         | 0.000178 | -0.00236 | 0.000179 | -0.00544 |
|                      | 64 swampland                  | 0.000122 | -0.0073  | 0.001063 | -0.00517 |
|                      | 65 bare land                  | 0.000453 | 0.000968 | 0.000506 | -0.00264 |
|                      | 66 rock and gravel            | 0.000398 | 0.002428 | 0.000748 | -0.00024 |
|                      | 67 alpine desert              | 0.000296 | 0.021335 | 0.000577 | 0.025023 |

### 2.2.2 Soil carbon density with above- and below-ground biomass carbon density, temperature, and precipitation

We also regressed the multiple linear regression relationships between soil organic carbon density and temperature, precipitation, and above- and below-ground biomass carbon density based on the spatially distributed data points derived from raster layers (i.e., about 4.6 million points in total). The coefficients of the regression equations are shown below.

**Table S2.** The coefficients of multiple linear regression equations for soil carbon density as a dependent variable of the precipitation, temperature, above- and below-ground biomass carbon density, temperature, and precipitation.

| Top-level categories | Sub-categories                | SOC          |              |              |             |
|----------------------|-------------------------------|--------------|--------------|--------------|-------------|
|                      |                               | PRE          | TEM          | AGC          | BGC         |
| 1 Farmland           | 12 dry farmland               | 0.006029599  | -0.791372812 | 1.55362964   | 2.141083142 |
| 2 Forest             | 21 wood land                  | 0.004630485  | -1.894260015 | 0.227098747  | 1.356163289 |
|                      | 22 shrubby land               | 0.006920127  | -1.601780929 | -0.998401926 | 5.771845704 |
|                      | 23 sparsely forested woodland | 0.010671103  | -1.490972572 | -1.600452571 | 6.310689849 |
|                      | 24 other forest land          | 0.014440896  | -1.564306802 | -0.183875384 | 4.051364583 |
| 3 Grassland          | 31 high coverage grassland    | 0.014683917  | -1.366679391 | -1.302431957 | 6.032943896 |
|                      | 32 middle coverage grassland  | 0.018523116  | -0.649982054 | -2.590096459 | 8.313697096 |
|                      | 33 low coverage grassland     | 0.013779964  | -0.208326455 | 3.825273507  | 11.28861913 |
| 4 Water              | 41 river and glacier          | 0.016497544  | -0.29739037  | 0.494744063  | 15.04759077 |
| 5 Built-up land      | 51 cities and towns           | 0.00443446   | -0.36441646  | 8.184681786  | 6.699415775 |
|                      | 52 rural settlements          | 0.00548865   | -0.720668162 | 2.334115283  | 3.180822031 |
|                      | 53 industry and traffic land  | 0.011776928  | -0.413893351 | 1.844301675  | 10.30405306 |
| 6 Other land         | 61 sandy land                 | 0.004092661  | -0.043404464 | 12.42160144  | 22.34852121 |
|                      | 62 Gobi                       | 0.00258486   | -0.084764329 | 9.801403801  | 23.25338506 |
|                      | 63 saline-alkali land         | -0.002247733 | -0.234647046 | 9.86380685   | 19.38647673 |
|                      | 64 swampland                  | 0.00953956   | -0.671068457 | 9.601896096  | 9.740369996 |
|                      | 65 bare land                  | 0.010658346  | -0.204879549 | 3.212742153  | 13.57744147 |
|                      | 66 rock and gravel            | 0.006686388  | -0.067359686 | -3.979062371 | 30.58633815 |
|                      | 67 alpine desert              | 0.01181091   | 0.591463466  | -4.518298434 | 24.5570386  |

### 2.2.3 Dead organic carbon density with soil biomass carbon density

Based on the carbon density data (c), the linear regression relationship between SOC density and DOC density was established with an empirical regression equation ( $y=0.0041x+5.1899$ ,  $R^2=0.6897$ ).

## 2.3 Calculating the carbon density dynamics data for each period

Based on the linear regression relationships and the difference of mean temperature and mean precipitation between each interdecadal, the first edition carbon density data were calculated for each interdecadal period. After that, the four major carbon pools

were corrected with CO<sub>2</sub> fertilization effect, forest management correction for forest land, and farm management correction for SOC in farmland; finally the corrected carbon density dynamic data for each period were as follows.

**Table S3.** The AGC density of different land-use types from 1980 to 2050.

| Top-level categories | Sub-categories                | 1980 | 2000 | 2020 | SSP126 |      | SSP245 |      | SSP585 |      |
|----------------------|-------------------------------|------|------|------|--------|------|--------|------|--------|------|
|                      |                               |      |      |      | 2030   | 2050 | 2030   | 2050 | 2030   | 2050 |
| 1 Farmland           | 12 dry farmland               | 0.21 | 0.23 | 0.27 | 0.29   | 0.32 | 0.30   | 0.34 | 0.30   | 0.37 |
| 2 Forest             | 21 wood land                  | 1.48 | 1.84 | 3.04 | 3.46   | 4.14 | 3.47   | 4.30 | 3.51   | 4.58 |
|                      | 22 shrubbery land             | 0.51 | 0.72 | 1.25 | 1.47   | 1.81 | 1.48   | 1.90 | 1.50   | 2.04 |
|                      | 23 sparsely forested woodland | 0.70 | 0.91 | 1.61 | 1.86   | 2.24 | 1.86   | 2.33 | 1.88   | 2.50 |
|                      | 24 other forest land          | 0.19 | 0.25 | 0.44 | 0.51   | 0.62 | 0.51   | 0.65 | 0.52   | 0.69 |
| 3 Grassland          | 31 high coverage grassland    | 0.56 | 0.57 | 0.82 | 0.92   | 1.03 | 0.92   | 1.10 | 0.93   | 1.20 |
|                      | 32 middle coverage grassland  | 0.27 | 0.26 | 0.37 | 0.40   | 0.44 | 0.41   | 0.47 | 0.41   | 0.51 |
|                      | 33 low coverage grassland     | 0.07 | 0.07 | 0.09 | 0.09   | 0.10 | 0.09   | 0.10 | 0.09   | 0.11 |
| 4 Water              | 41 river and glacier          | 0.00 | 0.00 | 0.00 | 0.00   | 0.00 | 0.00   | 0.00 | 0.00   | 0.00 |
| 5 Built-up land      | 51 cities and towns           | 0.07 | 0.07 | 0.08 | 0.08   | 0.08 | 0.08   | 0.09 | 0.08   | 0.09 |
|                      | 52 rural settlements          | 0.21 | 0.22 | 0.25 | 0.26   | 0.26 | 0.26   | 0.29 | 0.26   | 0.31 |
|                      | 53 industry and traffic land  | 0.09 | 0.09 | 0.11 | 0.11   | 0.10 | 0.11   | 0.11 | 0.11   | 0.12 |
| 6 Other land         | 61 sandy land                 | 0.01 | 0.02 | 0.02 | 0.02   | 0.02 | 0.02   | 0.02 | 0.02   | 0.03 |
|                      | 62 Gobi                       | 0.01 | 0.01 | 0.02 | 0.02   | 0.02 | 0.02   | 0.02 | 0.02   | 0.02 |
|                      | 63 saline-alkali land         | 0.04 | 0.04 | 0.04 | 0.04   | 0.04 | 0.04   | 0.05 | 0.04   | 0.05 |
|                      | 64 swampland                  | 0.14 | 0.13 | 0.14 | 0.14   | 0.14 | 0.14   | 0.15 | 0.14   | 0.16 |
|                      | 65 bare land                  | 0.03 | 0.04 | 0.05 | 0.05   | 0.05 | 0.05   | 0.06 | 0.05   | 0.06 |
|                      | 66 rock and gravel            | 0.01 | 0.02 | 0.03 | 0.03   | 0.03 | 0.03   | 0.04 | 0.03   | 0.04 |
|                      | 67 alpine desert              | 0.01 | 0.02 | 0.05 | 0.06   | 0.09 | 0.06   | 0.09 | 0.07   | 0.10 |

**Table S4.** The BGC density of different land-use types from 1980 to 2050.

| Top-level categories | Sub-categories                | 1980 | 2000 | 2020 | SSP126 |      | SSP245 |      | SSP585 |      |
|----------------------|-------------------------------|------|------|------|--------|------|--------|------|--------|------|
|                      |                               |      |      |      | 2030   | 2050 | 2030   | 2050 | 2030   | 2050 |
| 1 Farmland           | 12 dry farmland               | 0.19 | 0.18 | 0.19 | 0.18   | 0.17 | 0.18   | 0.18 | 0.19   | 0.19 |
| 2 Forest             | 21 wood land                  | 0.26 | 0.72 | 1.40 | 1.69   | 2.20 | 1.70   | 2.28 | 1.71   | 2.38 |
|                      | 22 shrubbery land             | 0.38 | 0.58 | 0.91 | 1.04   | 1.26 | 1.05   | 1.32 | 1.06   | 1.39 |
|                      | 23 sparsely forested woodland | 0.24 | 0.47 | 0.87 | 1.03   | 1.30 | 1.03   | 1.34 | 1.04   | 1.41 |
|                      | 24 other forest land          | 0.31 | 0.35 | 0.46 | 0.48   | 0.52 | 0.48   | 0.54 | 0.48   | 0.56 |
| 3 Grassland          | 31 high coverage grassland    | 0.63 | 0.61 | 0.74 | 0.76   | 0.77 | 0.77   | 0.83 | 0.77   | 0.89 |
|                      | 32 middle coverage grassland  | 0.33 | 0.31 | 0.37 | 0.38   | 0.37 | 0.38   | 0.39 | 0.38   | 0.42 |
|                      | 33 low coverage grassland     | 0.15 | 0.15 | 0.17 | 0.17   | 0.17 | 0.18   | 0.18 | 0.18   | 0.20 |
| 4 Water              | 41 river and glacier          | 0.00 | 0.00 | 0.00 | 0.00   | 0.00 | 0.00   | 0.00 | 0.00   | 0.00 |
| 5 Built-up land      | 51 cities and towns           | 0.12 | 0.13 | 0.14 | 0.14   | 0.14 | 0.15   | 0.16 | 0.15   | 0.17 |
|                      | 52 rural settlements          | 0.15 | 0.15 | 0.15 | 0.14   | 0.12 | 0.14   | 0.14 | 0.14   | 0.14 |
|                      | 53 industry and traffic land  | 0.13 | 0.13 | 0.14 | 0.13   | 0.12 | 0.13   | 0.13 | 0.14   | 0.14 |
| 6 Other land         | 61 sandy land                 | 0.06 | 0.06 | 0.08 | 0.08   | 0.08 | 0.08   | 0.09 | 0.08   | 0.09 |

|                       |      |      |      |      |      |      |      |      |      |
|-----------------------|------|------|------|------|------|------|------|------|------|
| 62 Gobi               | 0.05 | 0.05 | 0.06 | 0.07 | 0.07 | 0.07 | 0.07 | 0.07 | 0.08 |
| 63 saline-alkali land | 0.09 | 0.09 | 0.09 | 0.09 | 0.09 | 0.09 | 0.10 | 0.09 | 0.10 |
| 64 swampland          | 0.50 | 0.50 | 0.57 | 0.59 | 0.60 | 0.60 | 0.65 | 0.61 | 0.70 |
| 65 bare land          | 0.09 | 0.10 | 0.11 | 0.11 | 0.11 | 0.11 | 0.12 | 0.12 | 0.13 |
| 66 rock and gravel    | 0.07 | 0.08 | 0.09 | 0.10 | 0.10 | 0.10 | 0.11 | 0.10 | 0.11 |
| 67 alpine desert      | 0.08 | 0.09 | 0.14 | 0.16 | 0.19 | 0.17 | 0.21 | 0.17 | 0.23 |

**Table S5.** The SOC density of different land-use types from 1980 to 2050.

| Top-level categories | Sub-categories                | 1980  | 2000  | 2020  | SSP126 |       | SSP245 |       | SSP585 |       |
|----------------------|-------------------------------|-------|-------|-------|--------|-------|--------|-------|--------|-------|
|                      |                               |       |       |       | 2030   | 2050  | 2030   | 2050  | 2030   | 2050  |
| 1 Farmland           | 12 dry farmland               | 9.29  | 8.92  | 9.02  | 8.97   | 9.00  | 8.99   | 8.89  | 8.95   | 8.76  |
| 2 Forest             | 21 wood land                  | 18.94 | 18.62 | 18.89 | 18.22  | 17.60 | 18.26  | 17.41 | 18.18  | 17.06 |
|                      | 22 shrubbery land             | 18.45 | 18.39 | 19.13 | 18.69  | 18.43 | 18.75  | 18.35 | 18.69  | 18.19 |
|                      | 23 sparsely forested woodland | 12.47 | 12.53 | 13.78 | 13.47  | 13.49 | 13.51  | 13.31 | 13.44  | 13.10 |
|                      | 24 other forest land          | 14.66 | 13.51 | 13.75 | 12.91  | 12.00 | 12.94  | 11.68 | 12.87  | 11.40 |
| 3 Grassland          | 31 high coverage grassland    | 19.39 | 18.13 | 18.57 | 17.82  | 16.89 | 17.85  | 16.73 | 17.82  | 16.68 |
|                      | 32 middle coverage grassland  | 11.71 | 10.72 | 11.65 | 11.28  | 10.89 | 11.29  | 10.71 | 11.28  | 10.79 |
|                      | 33 low coverage grassland     | 6.01  | 5.79  | 6.36  | 6.31   | 6.24  | 6.34   | 6.32  | 6.35   | 6.50  |
| 4 Water              | 41 river and glacier          | 0.00  | 0.00  | 0.00  | 0.00   | 0.00  | 0.00   | 0.00  | 0.00   | 0.00  |
| 5 Built-up land      | 51 cities and towns           | 6.24  | 6.01  | 6.14  | 5.96   | 5.71  | 5.98   | 5.75  | 5.98   | 5.79  |
|                      | 52 rural settlements          | 9.56  | 9.05  | 8.94  | 8.51   | 7.96  | 8.54   | 7.89  | 8.50   | 7.78  |
|                      | 53 industry and traffic land  | 5.65  | 5.27  | 5.57  | 5.29   | 4.94  | 5.32   | 4.91  | 5.30   | 4.93  |
| 6 Other land         | 61 sandy land                 | 1.68  | 1.80  | 2.20  | 2.24   | 2.24  | 2.27   | 2.41  | 2.29   | 2.56  |
|                      | 62 Gobi                       | 1.74  | 1.75  | 2.00  | 1.98   | 1.90  | 2.00   | 2.04  | 2.01   | 2.14  |
|                      | 63 saline-alkali land         | 3.33  | 3.19  | 3.09  | 2.91   | 2.61  | 2.95   | 2.76  | 2.95   | 2.83  |
|                      | 64 swampland                  | 16.10 | 15.43 | 15.98 | 15.76  | 15.38 | 15.85  | 15.76 | 15.90  | 16.17 |
|                      | 65 bare land                  | 3.17  | 3.08  | 3.36  | 3.28   | 3.15  | 3.31   | 3.24  | 3.31   | 3.33  |
|                      | 66 rock and gravel            | 2.45  | 2.53  | 3.01  | 3.08   | 3.08  | 3.12   | 3.32  | 3.14   | 3.54  |
|                      | 67 alpine desert              | 0.46  | 1.14  | 3.00  | 3.99   | 5.12  | 4.00   | 5.62  | 4.11   | 6.35  |

**Table S6.** The DOC density of different land-use types from 1980 to 2050.

[illegible]

|                 |                              |      |      |      |      |      |      |      |      |      |
|-----------------|------------------------------|------|------|------|------|------|------|------|------|------|
| 5 Built-up land | 51 cities and towns          | 0.03 | 0.02 | 0.03 | 0.02 | 0.02 | 0.02 | 0.02 | 0.02 | 0.02 |
|                 | 52 rural settlements         | 0.04 | 0.04 | 0.04 | 0.03 | 0.03 | 0.03 | 0.03 | 0.03 | 0.03 |
|                 | 53 industry and traffic land | 0.02 | 0.02 | 0.02 | 0.02 | 0.02 | 0.02 | 0.02 | 0.02 | 0.02 |
| 6 Other land    | 61 sandy land                | 0.01 | 0.01 | 0.01 | 0.01 | 0.01 | 0.01 | 0.01 | 0.01 | 0.01 |
|                 | 62 Gobi                      | 0.01 | 0.01 | 0.01 | 0.01 | 0.01 | 0.01 | 0.01 | 0.01 | 0.01 |
|                 | 63 saline-alkali land        | 0.01 | 0.01 | 0.01 | 0.01 | 0.01 | 0.01 | 0.01 | 0.01 | 0.01 |
|                 | 64 swamp land                | 0.07 | 0.06 | 0.07 | 0.06 | 0.06 | 0.06 | 0.06 | 0.07 | 0.07 |
|                 | 65 bare land                 | 0.01 | 0.01 | 0.01 | 0.01 | 0.01 | 0.01 | 0.01 | 0.01 | 0.01 |
|                 | 66 rock and gravel           | 0.01 | 0.01 | 0.01 | 0.01 | 0.01 | 0.01 | 0.01 | 0.01 | 0.01 |
|                 | 67 alpine desert             | 0.00 | 0.00 | 0.01 | 0.02 | 0.02 | 0.02 | 0.02 | 0.02 | 0.03 |

### 3. The LUCC simulation and CS distribution for 2030 and 2050

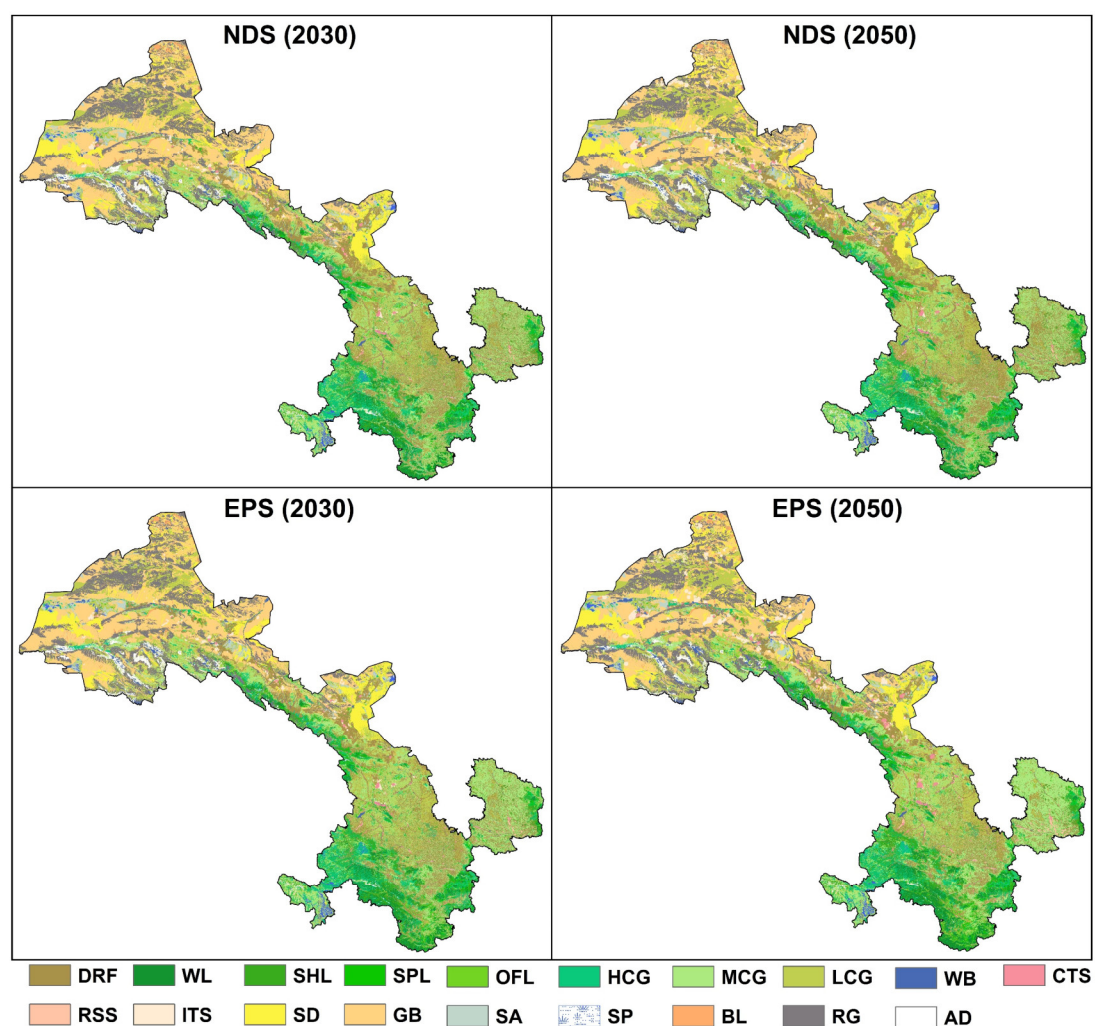

Figure S2. Spatial distribution of LUCC of 2030 and 2050 in Gansu under NDS and EPS.



#### 4. Carbon storage under different LUCC and climate change scenarios

**Table S7.** The CS of each land-use type in the Gansu Province from 1980 to 2020.

| Top-level categories | Sub-categories                | 1980          | 2000          | 2020          |
|----------------------|-------------------------------|---------------|---------------|---------------|
| 1 Farmland           | 12 dry farmland               | 628.71±156.92 | 614.34±153.27 | 608.14±151.88 |
| 2 Forest             | 21 wood land                  | 291.35±73.58  | 297.9±79.68   | 331.69±97.56  |
|                      | 22 shrubbery land             | 311.22±71.18  | 312.67±73.78  | 347.28±86.21  |
|                      | 23 sparsely forested woodland | 98.85±24.24   | 101.13±25.9   | 117.6±32.41   |
|                      | 24 other forest land          | 8.19±1.94     | 7.86±1.88     | 12.86±3.12    |
| 3 Grassland          | 31 high coverage grassland    | 534.33±128.03 | 500.54±120.38 | 535.06±131.72 |
|                      | 32 middle coverage grassland  | 742.78±195.25 | 677.87±178.27 | 758.73±201.22 |
|                      | 33 low coverage grassland     | 358±107.24    | 344.34±103.12 | 372.71±111.96 |
| 4 Water              | 41 river and glacier          | 0             | 0             | 0             |
| 5 Built-up land      | 51 cities and towns           | 2.39±0.7      | 2.53±0.75     | 5.78±1.71     |
|                      | 52 rural settlements          | 27.21±6.55    | 27.87±6.71    | 32.26±7.78    |
|                      | 53 industry and traffic land  | 1.31±0.4      | 1.26±0.39     | 7.25±2.22     |
| 6 Other land         | 61 sandy land                 | 50.85±25.94   | 54.4±27.82    | 64.91±33.14   |
|                      | 62 Gobi                       | 131.55±65.34  | 132.18±65.49  | 149.18±74.03  |
|                      | 63 saline-alkali land         | 28.95±10.92   | 27.84±10.51   | 24.55±9.24    |
|                      | 64 swampland                  | 43.89±11.09   | 42.03±10.62   | 42.24±10.71   |
|                      | 65 bare land                  | 13.05±4.95    | 12±4.57       | 13.76±5.23    |
|                      | 66 rock and gravel            | 114.41±48.68  | 119.46±51.09  | 149.36±63.76  |
|                      | 67 alpine desert              | 6.15±2.59     | 14.29±5.74    | 28.74±11.49   |

**Table S8.** The CS from 1980 to 2020 only under the LUTC effect.

| Top-level categories | Sub-categories                | 1980          | 2000          | 2020          |
|----------------------|-------------------------------|---------------|---------------|---------------|
| 1 Farmland           | 12 dry farmland               | 615.88±153.53 | 624.87±155.77 | 608.93±151.8  |
| 2 Forest             | 21 wood land                  | 305.54±85.87  | 305.08±85.74  | 308.45±86.69  |
|                      | 22 shrubbery land             | 322.06±78.07  | 318±77.08     | 326.74±79.2   |
|                      | 23 sparsely forested woodland | 107.79±28.78  | 106.27±28.37  | 105.83±28.25  |
|                      | 24 other forest land          | 7.47±1.8      | 7.70±1.85     | 12.14±2.92    |
| 3 Grassland          | 31 high coverage grassland    | 498.81±121.52 | 497.75±121.26 | 510.84±124.45 |
|                      | 32 middle coverage grassland  | 688.33±181.98 | 684.55±180.98 | 698.57±184.69 |
|                      | 33 low coverage grassland     | 347.93±104.39 | 346.56±103.98 | 341.01±102.31 |
| 4 Water              | 41 river and glacier          | 0             | 0             | 0             |
| 5 Built-up land      | 51 cities and towns           | 2.27±0.67     | 2.49±0.74     | 5.54±1.64     |
|                      | 52 rural settlements          | 25.19±6.07    | 27.16±6.54    | 31.75±7.65    |
|                      | 53 industry and traffic land  | 1.19±0.37     | 1.23±0.38     | 6.65±2.04     |
| 6 Other land         | 61 sandy land                 | 57.57±29.37   | 57.48±29.33   | 56.04±28.59   |

|                       |              |              |              |
|-----------------------|--------------|--------------|--------------|
| 62 Gobi               | 138.3±68.58  | 137.86±68.36 | 135.64±67.26 |
| 63 saline-alkali land | 26.69±10.07  | 26.75±10.1   | 24.25±9.15   |
| 64 swamp land         | 41.94±10.62  | 41.85±10.6   | 40.45±10.25  |
| 65 bare land          | 12.71±4.83   | 11.99±4.56   | 12.54±4.77   |
| 66 rock and gravel    | 127.42±54.46 | 128.52±54.93 | 134.84±57.63 |
| 67 alpine desert      | 29.64±11.87  | 29.63±11.87  | 23.41±9.37   |

**Table S9.** The CS of each land-use type in the Gansu Province of 2030 and 2050 with Future Climate Scenarios (SSP126, SSP245, and SSP585) under NDS.

| Top-level categories | Sub-categories                | ssp126        |               | ssp245        |               | ssp585        |               |
|----------------------|-------------------------------|---------------|---------------|---------------|---------------|---------------|---------------|
|                      |                               | 2030          | 2050          | 2030          | 2050          | 2030          | 2050          |
| 1 Farmland           | 12 dry farmland               | 601.95±150.09 | 656.04±163.45 | 603.63±150.55 | 650.96±162.3  | 601.49±150.26 | 644.82±160.98 |
| 2 Forest             | 21 wood land                  | 317.4±97.08   | 323.31±104.53 | 318.31±97.37  | 324.16±105.91 | 317.86±97.53  | 324.57±107.91 |
|                      | 22 shrubby land               | 343.29±87.22  | 343.84±90.31  | 344.44±87.61  | 345.04±91.38  | 343.99±87.68  | 345.76±92.67  |
|                      | 23 sparsely forested woodland | 120.45±34.28  | 132.32±39.15  | 120.87±34.34  | 131.94±39.4   | 120.56±34.36  | 132.16±40.11  |
|                      | 24 other forest land          | 10.98±2.68    | 9.72±2.4      | 11.02±2.69    | 9.52±2.37     | 10.96±2.68    | 9.37±2.34     |
| 3 Grassland          | 31 high coverage grassland    | 496.04±123.45 | 469.22±118.3  | 497.06±123.77 | 468.13±119.25 | 496.74±123.73 | 471.2±121.19  |
|                      | 32 middle coverage grassland  | 771.66±205.52 | 713.26±190.4  | 772.36±205.95 | 705.16±189.14 | 772.09±205.79 | 714.3±192.44  |
|                      | 33 low coverage grassland     | 383.29±114.96 | 425.94±128.01 | 384.95±115.76 | 432.52±129.87 | 385.66±115.93 | 445.87±134.17 |
| 4 Water              | 41 river and glacier          | 0             | 0             | 0             | 0             | 0             | 0             |
| 5 Built-up land      | 51 cities and towns           | 8.61±2.54     | 10.3±3.04     | 8.64±2.55     | 10.39±3.08    | 8.63±2.55     | 10.5±3.11     |
|                      | 52 rural settlements          | 35.32±8.5     | 32.78±7.86    | 35.44±8.53    | 32.63±7.86    | 35.32±8.49    | 32.32±7.77    |
|                      | 53 industry and traffic land  | 18.8±5.76     | 40.02±12.26   | 18.89±5.79    | 39.94±12.25   | 18.83±5.79    | 40.22±12.36   |
| 6 Other land         | 61 sandy land                 | 65.32±33.27   | 64.72±32.99   | 66.15±33.69   | 69.52±35.51   | 66.6±33.98    | 74.03±37.76   |
|                      | 62 Gobi                       | 139.21±69.32  | 117.71±58.49  | 141.01±69.99  | 125.99±62.58  | 141.6±70.32   | 132.61±65.79  |
|                      | 63 saline-alkali land         | 23.03±8.68    | 20.07±7.57    | 23.35±8.79    | 21.25±8.04    | 23.33±8.79    | 21.78±8.23    |
|                      | 64 swamp land                 | 40.19±10.21   | 41.01±10.44   | 40.41±10.27   | 42.14±10.75   | 40.55±10.32   | 43.33±11.09   |
|                      | 65 bare land                  | 14.7±5.58     | 12.31±4.67    | 14.82±5.62    | 12.68±4.83    | 14.83±5.64    | 13.09±4.98    |
|                      | 66 rock and gravel            | 153.44±65.66  | 143.54±61.32  | 155.35±66.47  | 154.81±66.31  | 156.55±66.87  | 165.27±70.47  |
|                      | 67 alpine desert              | 30.26±12.07   | 31.3±12.48    | 30.35±12.14   | 34.33±13.68   | 31.21±12.48   | 38.73±15.44   |

**Table S10.** The CS of each land-use type in the Gansu Province of 2030 and 2050 with Future Climate Scenarios (SSP126, SSP245, and SSP585) under EPS.

| Top-level categories | Sub-categories                | ssp126        |               | ssp245        |               | ssp585        |               |
|----------------------|-------------------------------|---------------|---------------|---------------|---------------|---------------|---------------|
|                      |                               | 2030          | 2050          | 2030          | 2050          | 2030          | 2050          |
| 1 Farmland           | 12 dry farmland               | 529.17±131.94 | 440.64±109.79 | 530.65±132.35 | 437.23±109.01 | 528.77±132.1  | 433.11±108.13 |
| 2 Forest             | 21 wood land                  | 342.87±104.88 | 413.68±133.74 | 343.85±105.19 | 414.77±135.51 | 343.37±105.36 | 415.29±138.07 |
|                      | 22 shrubby land               | 366.63±93.16  | 388.74±102.1  | 367.87±93.57  | 390.09±103.31 | 367.38±93.64  | 390.91±104.77 |
|                      | 23 sparsely forested woodland | 154.54±43.98  | 182.11±53.88  | 155.07±44.06  | 181.59±54.23  | 154.68±44.08  | 181.88±55.2   |
|                      | 24 other forest land          | 50.67±12.37   | 79.11±19.56   | 50.81±12.4    | 77.46±19.26   | 50.56±12.35   | 76.25±19.03   |

|                 |                              |               |               |               |               |               |               |
|-----------------|------------------------------|---------------|---------------|---------------|---------------|---------------|---------------|
| 3 Grassland     | 31 high coverage grassland   | 504.24±125.49 | 458.85±115.69 | 505.28±125.81 | 457.79±116.61 | 504.95±125.78 | 460.79±118.51 |
|                 | 32 middle coverage grassland | 779.41±207.59 | 806.33±215.24 | 780.12±208.02 | 797.17±213.82 | 779.85±207.86 | 807.51±217.55 |
|                 | 33 low coverage grassland    | 385.07±115.5  | 412.75±124.05 | 386.74±116.3  | 419.13±125.85 | 387.45±116.47 | 432.06±130.02 |
| 4 Water         | 41 river and glacier         | 0             | 0             | 0             | 0             | 0             | 0             |
| 5 Built-up land | 51 cities and towns          | 8.66±2.55     | 18.18±5.36    | 8.7±2.57      | 18.35±5.44    | 8.69±2.57     | 18.53±5.49    |
|                 | 52 rural settlements         | 35.7±8.59     | 48.71±11.68   | 35.83±8.62    | 48.48±11.68   | 35.7±8.58     | 48.03±11.55   |
|                 | 53 industry and traffic land | 18.69±5.73    | 42.15±12.91   | 18.78±5.76    | 42.05±12.9    | 18.72±5.75    | 42.35±13.02   |
| 6 Other land    | 61 sandy land                | 65.38±33.3    | 63.18±32.2    | 66.21±33.73   | 67.87±34.67   | 66.67±34.01   | 72.28±36.86   |
|                 | 62 Gobi                      | 138.4±68.92   | 116.87±58.07  | 140.19±69.58  | 125.09±62.14  | 140.77±69.91  | 131.66±65.32  |
|                 | 63 saline-alkali land        | 22.38±8.43    | 18.84±7.11    | 22.69±8.54    | 19.94±7.54    | 22.68±8.54    | 20.44±7.72    |
|                 | 64 swamp land                | 38.89±9.88    | 32.85±8.36    | 39.11±9.94    | 33.75±8.61    | 39.24±9.99    | 34.71±8.88    |
|                 | 65 bare land                 | 14.42±5.47    | 15.95±6.06    | 14.53±5.52    | 16.43±6.26    | 14.54±5.54    | 16.96±6.45    |
|                 | 66 rock and gravel           | 153.18±65.54  | 144.97±61.93  | 155.08±66.35  | 156.35±66.97  | 156.27±66.76  | 166.91±71.17  |
|                 | 67 alpine desert             | 29.78±11.88   | 23.81±9.49    | 29.87±11.95   | 26.12±10.4    | 30.71±12.28   | 29.46±11.75   |

**Table S11.** The CS of 2030 and 2050 only under the LUTC effect.

| Top-level categories | Sub-categories                | 2020           |                | NDS            |                 | EPS            |      |
|----------------------|-------------------------------|----------------|----------------|----------------|-----------------|----------------|------|
|                      |                               |                | 2030           | 2050           |                 | 2030           | 2050 |
| 1 Farmland           | 12 dry farmland               | 608.93±151.8   | 604.9±150.8    | 656.14±163.57  | 531.77±132.57   | 440.71±109.87  |      |
| 2 Forest             | 21 wood land                  | 308.45±86.69   | 294.85±82.87   | 293.25±82.42   | 318.52±89.52    | 375.21±105.45  |      |
|                      | 22 shrubbery land             | 326.74±79.2    | 324.32±78.62   | 320.41±77.67   | 346.38±83.96    | 362.24±87.81   |      |
|                      | 23 sparsely forested woodland | 105.83±28.25   | 107.82±28.78   | 113.72±30.36   | 138.33±36.93    | 156.51±41.78   |      |
|                      | 24 other forest land          | 12.14±2.92     | 10.93±2.63     | 10.24±2.46     | 50.42±12.12     | 83.3±20.02     |      |
| 3 Grassland          | 31 high coverage grassland    | 510.84±124.45  | 488.78±119.08  | 482.29±117.5   | 496.86±121.05   | 471.63±114.9   |      |
|                      | 32 middle coverage grassland  | 698.57±184.69  | 729.91±192.97  | 695.43±183.86  | 737.25±194.91   | 786.17±207.85  |      |
|                      | 33 low coverage grassland     | 341.01±102.31  | 352.77±105.84  | 396.33±118.91  | 354.41±106.33   | 384.06±115.23  |      |
| 4 Water              | 41 river and glacier          | 0              | 0              | 0              | 0               | 0              |      |
| 5 Built-up land      | 51 cities and towns           | 5.54±1.64      | 8.49±2.5       | 10.6±3.13      | 8.55±2.52       | 18.7±5.52      |      |
|                      | 52 rural settlements          | 31.75±7.65     | 36.42±8.77     | 36.05±8.68     | 36.81±8.86      | 53.57±12.9     |      |
|                      | 53 industry and traffic land  | 6.65±2.04      | 18.14±5.56     | 41.37±12.68    | 18.03±5.53      | 43.56±13.36    |      |
| 6 Other land         | 61 sandy land                 | 56.04±28.59    | 55.29±28.21    | 54.82±27.97    | 55.35±28.24     | 53.52±27.31    |      |
|                      | 62 Gobi                       | 135.64±67.26   | 127.66±63.3    | 112.01±55.55   | 126.91±62.93    | 111.21±55.15   |      |
|                      | 63 saline-alkali land         | 24.25±9.15     | 24.11±9.1      | 23.33±8.81     | 23.44±8.85      | 21.9±8.27      |      |
|                      | 64 swamp land                 | 40.45±10.25    | 38.96±9.87     | 40.7±10.31     | 37.7±9.55       | 32.6±8.26      |      |
|                      | 65 bare land                  | 12.54±4.77     | 13.69±5.21     | 11.92±4.53     | 13.42±5.11      | 15.44±5.87     |      |
|                      | 66 rock and gravel            | 134.84±57.63   | 135.36±57.86   | 126.42±54.04   | 135.12±57.76    | 127.68±54.58   |      |
|                      | 67 alpine desert              | 23.41±9.37     | 18.65±7.47     | 15.05±6.03     | 18.35±7.35      | 11.45±4.59     |      |
| SUM                  |                               | 3383.62±958.66 | 3391.05±959.44 | 3440.08±968.48 | 3447.62 ±974.09 | 3549.46±998.72 |      |

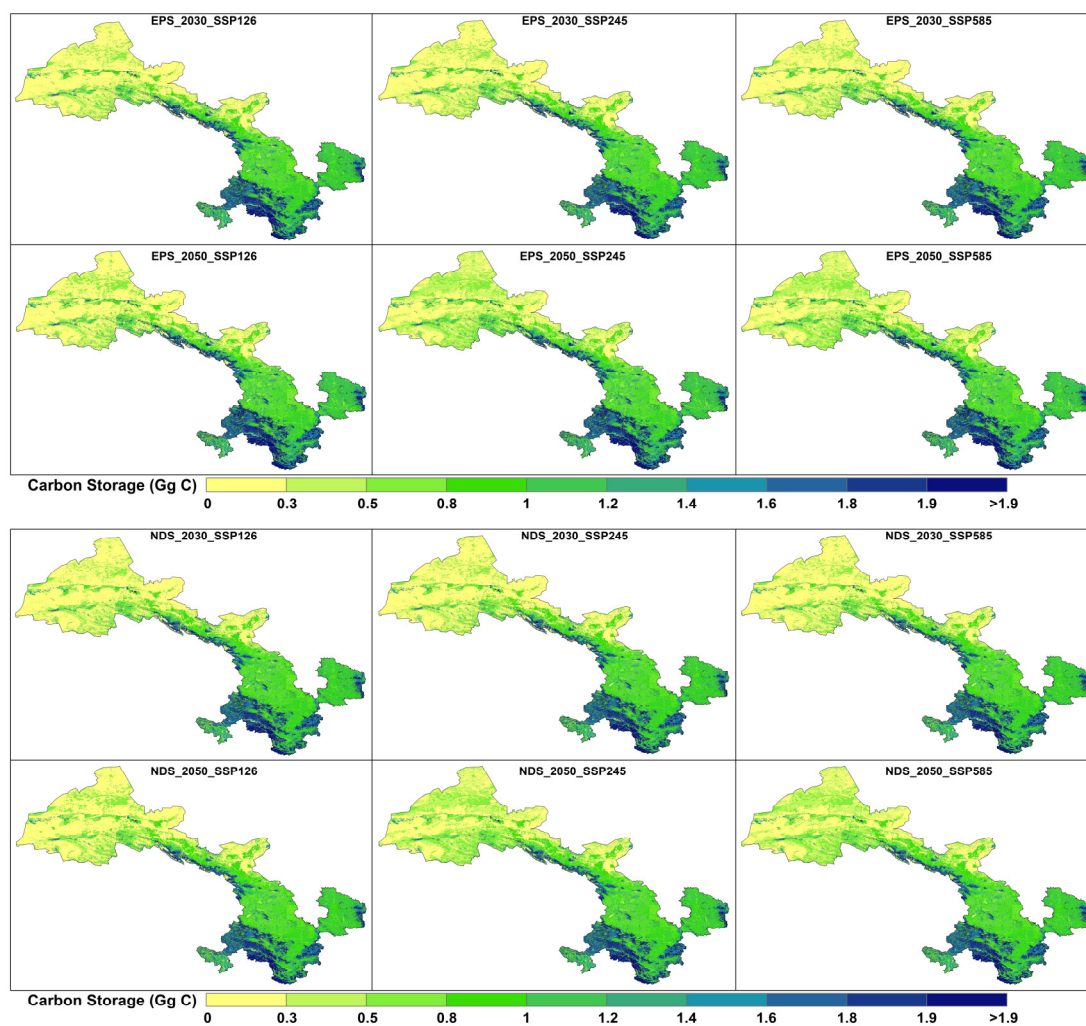

**Figure S3.** Spatial distribution of CS in 2030 and 2050 in Gansu under the LUCC Scenarios (NDS and EPS) and Future Climate Scenarios (SSP126, SSP245, and SSP585). Note: Carbon storage per pixel (300m \* 300m).

## 5. The fire statistics of the Gansu Province from 2000 to 2017

**Table S12.** Fire statistics of the Gansu Province from 2000 to 2017.

| Year | Fire incidence | Total burning area | Affected forest area | Fire source            |                   |
|------|----------------|--------------------|----------------------|------------------------|-------------------|
|      |                | (ha)               | (ha)                 | Artificial fire source | Other fire source |
| 2000 | 27             | 185                | 11                   | 23                     | 4                 |
| 2001 | 14             | 25                 | 19.3                 | 13                     | 1                 |
| 2002 | 10             | 20                 | 2.5                  | 6                      | 4                 |
| 2003 | 30             | 2353.6             | 724.1                | 27                     | 3                 |
| 2004 | 24             | 41                 | 7.8                  | 20                     | 4                 |
| 2005 | 4              | 9                  | 1                    | 3                      | 1                 |
| 2006 | 12             | 9.7                | 8.2                  | 12                     | 0                 |
| 2007 | 7              | 4                  | 1                    | 5                      | 2                 |
| 2008 | 15             | 10                 | 3                    | 13                     | 2                 |
| 2009 | 29             | 78                 | 2                    | 26                     | 3                 |
| 2010 | 18             | 273                | 38                   | 13                     | 5                 |
| 2011 | 7              | 144                | 24                   | 2                      | 5                 |

|      |    |     |     |    |   |
|------|----|-----|-----|----|---|
| 2012 | 11 | 85  | 8   | 7  | 4 |
| 2013 | 16 | 32  | 9   | 12 | 4 |
| 2014 | 21 | 101 | 37  | 21 | 0 |
| 2015 | 8  | 15  | 11  | 8  | 0 |
| 2016 | 9  | 264 | 101 | 9  | 0 |
| 2017 | 6  | 15  | 11  | 6  | 0 |
